# Supplementary material
Source: MDPI journal article supplement (https://www.mdpi.com/2071-1050/7/7/8649)
Supplement: s1 [file s1]

## Supplementary Information

# Framing Processes in the Envisioning of Low-Carbon, Resilient Cities: Results from Two Visioning Exercises. *Sustainability* 2015, 7, 8649-8683

Stephen McGrail <sup>1,\*</sup>, A. Idil Gaziulusoy <sup>2</sup> and Paul Twomey <sup>3</sup>

<sup>1</sup> Swinburne Institute for Social Research, Swinburne University, Hawthorn VIC 3122, Australia

<sup>2</sup> Victorian Eco-Innovation Lab (VEIL), Faculty of Architecture, Building and Environment, University of Melbourne, Parkville VIC 3010, Australia; E-Mail: idil.gaziulusoy@unimelb.edu.au

<sup>3</sup> Faculty of Built Environment and Centre for Energy and Environmental Markets, University of New South Wales, Sydney NSW 2052, Australia; E-Mail: p.twomey@unsw.edu.au

\* Author to whom correspondence should be addressed; E-Mail: smcgrail@swin.edu.au or stephen.mcgrail@gmail.com; Tel.: +61-0-419-533-712.

## Visions and Pathways 2040 Foundation Workshops

### Pre-workshop Questionnaire (to be completed online)

#### Section 1: Stepping into the future

- (1) What have been the main forces and processes of change that have shaped [SPECIFIC CITY (Melbourne/Sydney)] life over the last 30 years?
- (2) Imagine you are living in [SPECIFIC CITY (Melbourne/Sydney)] in 2040. It is now a global model city of a super-low-carbon city that can bounce back from extreme weather events and other shocks. You receive a visit from friends (via a time machine) from the year 2014. What are the first things you would want to show these time tourists that would ‘prove’ that an extraordinary 26 years have passed?
- (3) What “disruptive” forces do you think will affect [SPECIFIC CITY (Melbourne/Sydney)] pathway to a low carbon city over the next 30 years? Please consider them under the following headings and mark each force with a “P” for a positive influence or an “N” for a negative influence. (*Instruction: please separate each force with a comma, e.g. disruptive force 1 (P), disruptive force 2 (N), disruptive force 2 (P/N), etc.*)
  - TECHNOLOGIES AND PHYSICAL INFRASTRUCTURE:
  - LIFESTYLES AND BEHAVIOUR:
  - NATURAL ENVIRONMENT:

- BUSINESS, GOVERNANCE AND ECONOMICS:

*Section 2: Expectations and previous experience*

- (4) What are your reasons for attending this Visions and Pathways 2040 workshop (apart from having been invited)?
- (5) What are your expectations of the workshop in terms of its objectives and outcomes?
- (6) Have you participated in a visioning workshop before?
- (7) Could you provide us with the following details about the visioning processes you have participated in:
  - AIM OF THE VISIONING PROCESS:
  - WHEN WAS THE PROCESS RUN (YEAR) AND WHO ORGANISED IT:
  - SUMMARY OF THE PROCESS FOLLOWED:

*Section 3: Demographics and contact information*

Contact/personal information

- Phone number:
- Email address:
- Profession/role:
- Organisation:
- Name:

Age

Gender
